Development 135, 3577-3586 (2008) doi:10.1242/dev.022350

# Pbx1 functions in distinct regulatory networks to pattern the great arteries and cardiac outflow tract

Ching-Pin Chang<sup>1,\*†</sup>, Kryn Stankunas<sup>1,\*</sup>, Ching Shang<sup>1</sup>, Shih-Chu Kao<sup>1</sup>, Karen Y. Twu<sup>1</sup> and Michael L. Cleary<sup>2,†</sup>

The patterning of the cardiovascular system into systemic and pulmonic circulations is a complex morphogenetic process, the failure of which results in clinically important congenital defects. This process involves extensive vascular remodeling and coordinated division of the cardiac outflow tract (OFT). We demonstrate that the homeodomain transcription factor Pbx1 orchestrates separate transcriptional pathways to control great-artery patterning and cardiac OFT septation in mice. *Pbx1*-null embryos display anomalous great arteries owing to a failure to establish the initial complement of branchial arch arteries in the caudal pharyngeal region. *Pbx1* deficiency also results in the failure of cardiac OFT septation. *Pbx1*-null embryos lose a transient burst of *Pax3* expression in premigratory cardiac neural crest cells (NCCs) that ultimately specifies cardiac NCC function for OFT development, but does not regulate NCC migration to the heart. We show that Pbx1 directly activates *Pax3*, leading to repression of its target gene *Msx2* in NCCs. Compound *Msx2/Pbx1*-null embryos display significant rescue of cardiac septation, demonstrating that disruption of this Pbx1-Pax3-Msx2 regulatory pathway partially underlies the OFT defects in *Pbx1*-null mice. Conversely, the great-artery anomalies of compound *Msx2/Pbx1*-null embryos remain within the same spectrum as those of *Pbx1*-null embryos. Thus, Pbx1 makes a crucial contribution to distinct regulatory pathways in cardiovascular development.

**KEY WORDS:** Pbx, Hox, Pax3, Msx2, Heart development, Vascular patterning, Mouse

## INTRODUCTION

Anomalies of the cardiac outflow tract (OFT) are among the most common congenital malformations in humans. They account for 20-30% of congenital heart anomalies (Sandler, 2004), which occur in at least 1% of live births and lead to significant morbidity and mortality. The high incidence of anomalies in part reflects the fact that cardiac OFT formation is a complex developmental process that requires several elaborate morphogenetic steps, including the division of a common arterial trunk, alignment of the divided arteries to their respective cardiac chambers, and the formation of valves for each arterial channel (Harvey and Rosenthal, 1999). Development of the great arteries that supply the head, neck and upper limbs is also a challenging task for developing embryos. This process involves extensive vascular remodeling of five pairs of primitive branchial arch arteries to form a distinctive arterial network. Perturbations of branchial arch artery patterning in humans result in a variety of vascular anomalies that often require surgical correction.

Development of the cardiac OFT and branchial arch arteries requires a specific subpopulation of neural crest cells (NCCs), the cardiac NCCs, which originate from rhombomeres 6, 7 and 8 in the hindbrain and migrate to the branchial arches and heart to regulate patterning of the branchial arch arteries and septation of the OFT, respectively (Kirby et al., 1983). Ablation of cardiac NCCs in the chick leads to characteristic cardiac and vascular anomalies, including persistent truncus arteriosus (PTA) and aberrant branchial artery patterning. Loss-of-function genetic experiments in mice

have provided several models that recapitulate all or part of the NCC ablation phenotype in chick (reviewed by Kirby, 2007). Among a variety of signaling and transcriptional regulators, these studies have demonstrated crucial roles for several homeodomain transcription factors. Mice deficient for *Hoxa3* have defects in branchial arch arteries consistent with a NCC defect (Chisaka and Capecchi, 1991; Chisaka and Kameda, 2005; Kameda et al., 2003). Similarly, disrupted Hox expression in chick embryos is associated with abnormal patterning of the great arteries, but not with cardiac OFT defects (Kirby et al., 1997). With the exception of *Hoxa3*, however, single Hox gene deficiencies in mice have not been found to affect cardiovascular development, possibly reflecting redundancy in their contributions. Conversely, mutation of the *Pax3* gene, which encodes a paired-homeodomain transcription factor, results in abnormal patterning of the branchial arch arteries and cardiac OFT (Conway et al., 1997; Epstein, 1996). *Msx2*, a homeodomain transcription factor, is an obligate repressed target of Pax3 in heart development (Kwang et al., 2002) as loss-of-function of *Msx2* rescues the cardiac defects of *Splotch* (*Pax3* mutant) mice.

Pbx1 is a TALE-class homeodomain transcription factor that forms heterodimeric complexes with a subset of Hox homeodomain proteins that are essential for regulating segmental identities during development (Chang et al., 1996; Chang et al., 1995; Knoepfler and Kamps, 1995; Peltenburg and Murre, 1996; Phelan et al., 1995). Interactions with Pbx1 confer a significant increase in the otherwise modest DNA-binding specificities and affinities of Hox proteins in vitro (Chang et al., 1996), and Pbx1 deficiency compromises Hox (Selleri et al., 2001) and para-Hox (Kim et al., 2002) protein functions in vivo. Pbx1 also partners with Meis/Prep proteins, members of the TALE class of homeodomain transcription factors (Abu-Shaar et al., 1999; Chang et al., 1997), which facilitate the formation of trimeric transcriptional complexes with Hox proteins (Jacobs et al., 1999). Consistent with the roles of Hox genes in specifying rhombomere identities, both Pbx and Meis orthologs regulate hindbrain

<sup>1</sup>Division of Cardiovascular Medicine, Department of Medicine, Stanford University, Stanford, CA 94305, USA. <sup>2</sup>Department of Pathology, Stanford University, Stanford, CA 94305, USA.

\*These authors contributed equally to this work

†Authors for correspondence (e-mails: chingpin@stanford.edu; mcleary@stanford.edu)

development in zebrafish (Choe et al., 2002; Waskiewicz et al., 2001; Waskiewicz et al., 2002). However, as the cardiac OFT in zebrafish does not normally divide into separate circulations, these previous studies did not address whether Pbx1 is required for the contribution of rhombomere-derived cardiac NCCs to OFT septation or branchial arch artery patterning.

In the current study, we demonstrate that Pbx1 impacts branchial arch artery patterning by controlling formation of the fourth and sixth branchial arches. Additionally, Pbx1 cooperates with Meis1 and/or Hox proteins to induce a high, but transient, activation of Pax3 in premigratory cardiac NCCs that ultimately governs their function, but not migration, during OFT septation.

## MATERIALS AND METHODS

### Mice

*Pbx1*-null, *Wnt1Cre* and *Pax3Cre* mice have been described previously (Jiang et al., 2000; Li et al., 2000; Selleri et al., 2001). *Pbx1*<sup>+/-</sup> mice were maintained in a C57BL/6 background. Phenotypes of *Pbx1*-null mice were typically analyzed in embryos (E10.5-15.5) resulting from intercrossed parental mice that had been backcrossed to the C57BL/6 strain background for at least eight generations. Gestational age was determined by the date of observing a vaginal plug [set at embryonic day (E) 0.5], as confirmed by ultrasonography (Chang et al., 2003).

### Angiography and vascular casting

Chest walls of mouse embryos were opened under microscopic visualization. A 33-gauge needle (Hamilton) mounted on a 1 ml tuberculin syringe was used to inject an acrylic resin (Batson no. 17) containing blue dye (Methyl Methacrylate Casting Kit, Polyscience) into the right ventricle. The dynamic flow of the blue dye filling the right ventricle, main pulmonary artery, ductus arteriosus, aortic arch and ascending aorta was carefully observed. Following angiography, embryos were held at 4°C for 2-6 hours to allow the resin to polymerize and cast the vasculature. Soft tissues of the embryos were subsequently dissolved in potassium hydroxide (Maceration Solution, Polysciences) at 55°C for 1-3 hours to expose the vascular casts, which were then cleaned and photographed under a dissecting microscope. For India ink-based angiography, embryos were harvested at E10.5 or E11.5 and fixed overnight in 4% paraformaldehyde (PFA) in phosphate-buffered saline (PBS). India ink (undiluted, water-insoluble form) was injected into the ventricles using a fine glass micropipette while the embryos rested in PBS. For E11.5 embryos, the branchial arches and surrounding tissues were carefully dissected to expose the branchial arch arteries prior to imaging.

### Histology

Paraffin sections of mouse embryos were prepared as described previously (Stankunas et al., 2008a). Consecutive sections of 5-7 μm through the chest cavity were collected and stained with Hematoxylin and Eosin.

### RNA in situ hybridization and β-galactosidase staining

These procedures were performed as described previously (Stankunas et al., 2008a). The plexin A2, *Pax3* and *Msx2* antisense probes were as described previously (Brown et al., 2001; Kwang et al., 2002).

### Immunostaining

Fluorescent immunostaining and immunohistochemistry on paraffin tissue sections (7 μm) were performed as previously described (Chang et al., 2004). The anti-Pbx1b monoclonal antibody (clone 41.1) (Chang et al., 1997) and anti-Pax3 monoclonal antibody (concentrate, Developmental Studies Hybridoma Bank) were used at 1:300 and 1:500 dilution, respectively, for immunostaining.

### Electrophoretic mobility shift assay (EMSA)

EMSA was performed as described previously (Chang et al., 1995; Wu et al., 2007). Proteins (Pbx1a, Pbx2, Pbx3, Meis1, HoxB2, HoxB4 and HoxB7) were prepared using a TnT Quick Coupled Transcription/Translation System (Promega) following the manufacturer's instructions. Oligonucleotides probes corresponding to sequences from the *Pax3* promoter were (5' to 3'): Site A, CTCTACATCAAAACTGTCAAAGGCTCT; Site B, CTCTCCTT-TTGATTGATTAAGCTCT.

### Luciferase reporter assays

The 1.6 kb promoter region of the *Pax3* gene was amplified from mouse genomic DNA and cloned into the pGL3-basic vector (Promega). Expression plasmids for Pbx1b, Meis1 and HoxB4 were described previously (Chang et al., 1997; Chang et al., 1995). PC12 cells were co-transfected with expression plasmids, a *Pax3* luciferase reporter construct and a constitutively expressing *Renilla* luciferase construct for normalization of transfection efficiency using Fugene 6 Transfection Reagent (Roche). Luciferase activities were analyzed using a Dual Luciferase Reporter Assay System (Promega). Fold activation was calculated relative to reporter baseline activities, and data presented as mean ± one s.d. *P*-values were determined using Student's *t*-test.

## RESULTS

### Pbx1 is required for cardiac OFT septation

Septation of the cardiac OFT in mice occurs between E11.5 and E12.5, and the interventricular septum is sealed by E14.5 (Fig. 1A,D,F). By contrast, angiographic and serial histological analysis of *Pbx1*<sup>+/-</sup> embryos at E14.5 showed a single common arterial trunk (truncus arteriosus) that arose directly from the right ventricle with no arterial or OFT septation and no ductus arteriosus (Fig. 1B,E). The absence of the conal septum, which normally contributes to the sealing of the interventricular septum, resulted in a large, non-restrictive ventricular septal defect approaching the size of the normal aortic root (Fig. 1G).

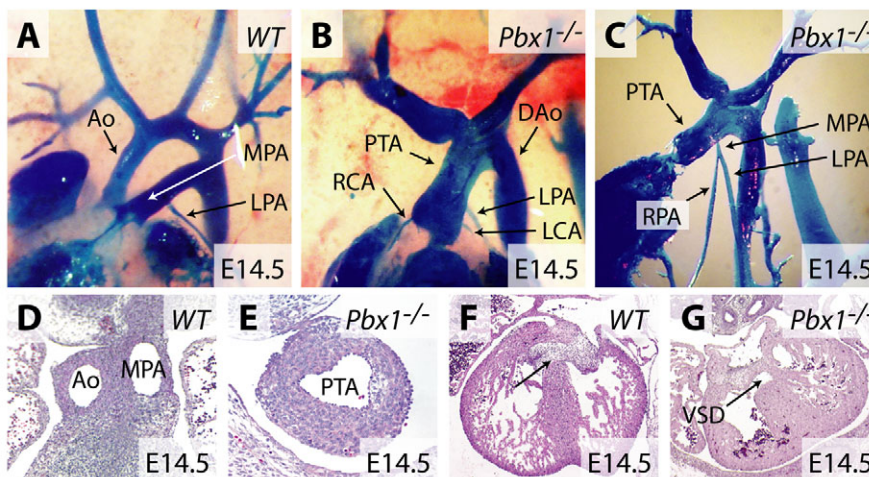

**Fig. 1. *Pbx1* is required for cardiac OFT septation.**

(A-C) Angiographic casting of wild-type (A) and *Pbx1*<sup>+/-</sup> (B,C) E14.5 mouse embryos. (D-G) Hematoxylin and Eosin-stained transverse sections through the outflow tract (D,E) and ventricular septal regions (F,G) of wild-type (D,F) and *Pbx1*<sup>+/-</sup> (E,G) E14.5 embryos. The arrow indicates the interventricular septum. Ao, aorta; MPA, main pulmonary artery; RPA and LPA, right and left pulmonary arteries; PTA, persistent truncus arteriosus; RCA and LCA, right and left coronary arteries; DAo, descending aorta; VSD, ventricular septal defect.



The PTA in *Pbx1*<sup>-/-</sup> embryos displayed dual features of the aorta and main pulmonary artery in that it gave rise to coronary, pulmonary and systemic arteries. The right and left coronary arteries arose anteriorly, whereas a short stump of the main pulmonary artery arose posteriorly from the truncus (Fig. 1C). This short main pulmonary artery divided into the right and left pulmonary arteries (Fig. 1C), which were of similar size to wild-type pulmonary arteries (Fig. 1, compare A with C). After the coronary and pulmonary artery branching points, the truncus continued as the ascending aorta and generally arched to the left to form the descending aorta (Fig. 1B). These data demonstrate a requirement for *Pbx1* in septation of the cardiac OFT.

### Pbx1 regulates patterning of the branchial arch arteries

The aortic arch originates in the cervical region of the embryo during early development and, along with the developing heart, descends to its normal intrathoracic location by E13.5 (Fig. 2A). In *Pbx1*<sup>-/-</sup> embryos, the aortic arch failed to descend into the thorax and remained cervical in location (Fig. 2B), leading to a phenotype reminiscent of the human anomaly ‘cervical aortic arch’. As a consequence, the peripheral pulmonary arteries descended to the thorax to reach the lungs (Fig. 1C, Fig. 2E), in contrast to the normal course of pulmonary arteries within the thorax. In 18% ( $n=3/17$ ) of *Pbx1*<sup>-/-</sup> embryos, the aorta arched to the right side, creating a mirror image of the arteries branching from the aorta (Fig. 2F).

The great arteries, which supply the head, neck and upper limbs, were aberrantly patterned in *Pbx1*<sup>-/-</sup> embryos ( $n=17$ ). The left common carotid artery (CCA), which normally arises from the aortic arch, and the right CCA, which branches off the brachiocephalic artery (BCA), were generally absent in *Pbx1*<sup>-/-</sup> embryos (Fig. 2C,D). In the absence of the CCA, the external carotid artery (ECA) and internal carotid artery (ICA) arose directly from

the aortic arch (Fig. 2D). Occasionally, a residual stump of CCA was present, connecting the ECA and ICA to the aortic arch (Fig. 2D and data not shown). The identity of the ECA was confirmed by its branching into facial and superficial temporal arteries (not shown); the ICA identity by its continued course into the cranium. The right subclavian artery (RSA), which normally arises from the BCA (Fig. 2C), originated instead from the descending aorta distal to the origin of the left subclavian artery (LSA) in *Pbx1*<sup>-/-</sup> embryos (Fig. 2E). The LSA, instead of arising from the aortic arch, arose from the descending aorta in *Pbx1*<sup>-/-</sup> embryos (Fig. 2C,E). The identities of the RSA and LSA were confirmed by their branching into internal vertebral (IVA), internal mammary (IMA) and axillary arteries (AA) (Fig. 2E), and by their destination in the right and left forelimbs, respectively.

### Pbx1 is required for caudal branchial arch development

To examine whether the abnormal great-artery patterning seen at E14.5 in *Pbx1*<sup>-/-</sup> embryos reflected aberrant remodeling or a failure to establish the initial complement of branchial arches, India ink injections were used to mark the arterial systems of E10.5 and E11.5 embryos, prior to branchial arch artery regression. Instead of possessing three branchial arch arteries on each side (Fig. 2G), *Pbx1*<sup>-/-</sup> embryos ( $n=5$ ) had only one or two patent branchial arch arteries (on both left and right sides) (Fig. 2H). When two arch arteries were present, the caudal-most artery was always narrow. The anatomic position of the aortic arches relative to the branchial arches was consistent with a failure to establish the sixth, and frequently the fourth, branchial arch arteries.

The arch arteries are derived from mesodermal cells of the branchial arches, and *Pbx1*<sup>-/-</sup> embryos have abnormalities in the development of the pharyngeal pouches of the caudal branchial arches (Manley et al., 2004). We therefore examined whether the

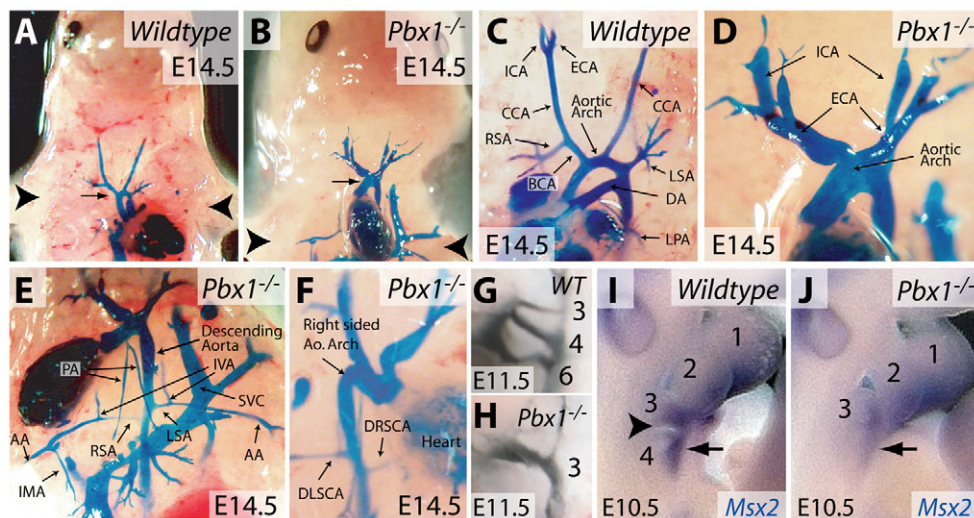

**Fig. 2. *Pbx1* contributes to patterning of the branchial arch arteries.** (A-F) Angiographic casting of wild-type (A,C) and *Pbx1*<sup>-/-</sup> (B,D-F) E14.5 mouse embryos. (A,B) The position of the aortic arch (arrow) is indicated relative to the forelimbs (arrowheads). (G,H) India ink casting of the branchial arch arteries in wild-type (G) and *Pbx1*<sup>-/-</sup> (H) E11.5 embryos. The branchial arch arteries are numbered according to branchial arch origin. (I,J) Whole-mount in situ hybridization staining for *Msx2* (blue) on wild-type (I) and *Pbx1*<sup>-/-</sup> (J) E10.5 embryos. The arrowhead indicates the groove separating the third and fourth branchial arches in the wild-type embryo. The arrow indicates *Msx2* expression in the fourth branchial arch. CCA, common carotid artery; ICA, internal carotid artery; ECA, external carotid artery; DA, ductus arteriosus; BCA, brachiocephalic artery; RSA and LSA, right and left subclavian arteries; LPA, left pulmonary artery; PA, right and left pulmonary arteries; IVA, internal vertebral artery; AA, axillary artery; IMA, internal mammary artery; SVC, superior vena cava; DLSCA, developmentally left, but anatomically right subclavian artery; DRSCA, developmentally right, but anatomically left subclavian artery.

branchial arches formed normally in the absence of *Pbx1* by using *Msx2* whole-mount in situ hybridization to mark mesenchymal cells of the arches (MacKenzie et al., 1992). At E10.5, the pharyngeal groove separating arch 3 and 4 was absent in *Pbx1*<sup>-/-</sup> embryos (Fig. 2, J versus I), and the fourth branchial arch was smaller than normal and showed reduced *Msx2* staining. Therefore, the great-artery patterning defects in *Pbx1*<sup>-/-</sup> embryos are at least in part due to a failure to develop a full set of branchial arches, which might also underlie the absence or reduction of organs derived from the caudal pharyngeal region (Manley et al., 2004).

### ***Pbx1* is widely present in cells regulating branchial arch artery and cardiac OFT development**

The OFT septation and great-artery patterning defects observed in *Pbx1*-deficient embryos are similar to those previously associated with defects in cardiac NCC migration and/or function (Kirby et al., 1983), suggesting a possible role in these processes. Alternatively, the OFT defects could represent a failure of secondary heart field (SHF)-derived cells to populate the OFT or aberrations in endocardial cushion development. The presence of *Pbx1b*, the major isoform of *Pbx1* during development (Schnabel et al., 2001), was examined by immunostaining in each of these relevant tissues. At E8.75, *Pbx1b* was present in all cells of the hindbrain, including the premigratory NCCs at the extreme dorsal tip of the neural tube (the neuroectodermal junction) (Fig. 3A). By E9.5, *Pbx1b* was found in many, but not all, cells of the neural tube, including the premigratory NCCs. *Pbx1b* was also detected in many paraxial mesoderm cells flanking the neural tube at both E8.75 and E9.5 (Fig. 3A,B). In the septating OFT at E11.0, *Pbx1b* was abundant in vascular smooth muscle cells (Fig. 3C). *Pbx1b* was also present throughout the mesenchyme of the endocardial cushion, most likely in cells derived from both endocardial cells (by an epithelial-to-mesenchymal transformation) and NCCs (Fig. 3C). Whereas *Pbx1b* was decreased in cardiomyocytes of the OFT, it remained present at low levels in cushion endocardial cells (Fig. 3C). An immunofluorescence based-staining method for *Pbx1b* demonstrated its broad, but not ubiquitous, presence in E9.5 embryos (Fig. 3D-F). A higher magnification view of the region encompassing the E9.5 aortic sac and OFT revealed abundant *Pbx1b* in SHF cells entering the OFT and in the ectoderm, with lower *Pbx1b* levels in endocardial cells (Fig. 3G). *Pbx1b* was also found in many, but not all, endoderm-derived cells of the pharyngeal pouches and in mesenchymal cells throughout the embryo, including in the branchial arches (Fig. 3H). *Pbx1b* was present only in the endocardium (at low levels), among cells of the atria and left ventricle (Fig. 3I). Our staining results are consistent with other studies (Manley et al., 2004; Schnabel et al., 2001; Selleri et al., 2001; Stankunas et al., 2008b) and indicate many possible sites of action for *Pbx1b* in branchial arch artery and OFT development, including cardiac NCCs.

### ***Pbx1* is not required for migration of cardiac NCCs into the outflow tract**

NCC migration was assessed by whole-mount RNA in situ hybridization with a plexin A2 probe that stains post-migratory NCCs (Brown et al., 2001). In *Pbx1*<sup>-/-</sup> embryos, plexin A2 staining highlighted two streams of NCCs migrating into the cardiac OFT, as seen in wild-type embryos (Fig. 4A,B). The absence of a generalized NCC migration defect in *Pbx1*<sup>-/-</sup> embryos was confirmed by plexin A2 staining of the dorsal root ganglia and sympathetic chains (Fig. 4C,D). Cell fate mapping, using *Wnt1* promoter-driven Cre activity and the *Rosa26R<sup>lacZ</sup>* line to mark NCCs and their derivatives (Jiang et al., 2000), showed that NCCs migrated into the cardiac OFT of

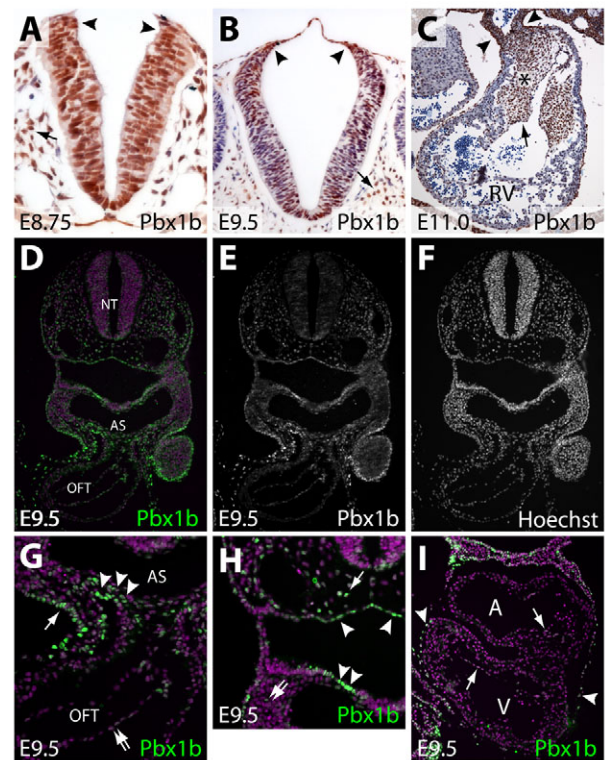

**Fig. 3. *Pbx1* is present in multiple cell types that influence OFT septation and artery patterning, including premigratory neural crest cells.** (A-C) Immunohistochemical analysis of the *Pbx1b* isoform of *Pbx1* (brown) in sections of mouse neural tube at E8.75 (A) and E9.5 (B) and the outflow tract (OFT) at E11.0 (C). Sections are counterstained with Hematoxylin. (A,B) Arrowheads indicate the neuroectodermal junction where neural crest cells (NCCs) originate. Arrows indicate paraxial mesodermal cells. (C) Arrowheads show vascular smooth muscle cells of the OFT. The asterisk indicates the endocardial cushion, the arrow cushion endocardium. (D-I) Immunofluorescent staining for *Pbx1b* in sections of a wild-type E9.5 embryo. (D,G,H,I) *Pbx1b* is in green and the nuclei are purple (stained with Hoechst). (E,F) The *Pbx1b* and Hoechst channels are shown separately in grayscale. (G,H). Higher-magnification views of specific regions of the embryo shown in D. (G) Arrowheads indicate secondary heart field and/or NCCs entering the OFT. The arrow points to ectodermal cells. The double arrow indicates endothelial cells of the OFT. (H) The arrowheads indicate endodermal cells lining the pharyngeal pouch. The arrow indicates a paraxial mesodermal cell. The double arrow indicates mesenchymal cells of the branchial arches. (I) *Pbx1b* immunofluorescent staining of a section of an E9.5 embryonic heart. Arrows mark endocardial cells and arrowheads indicate pericardial cells. RV, right ventricle; NT, neural tube; AS, aortic sac.

both wild-type and *Pbx1*-null embryos (Fig. 4E,F). Thus, although *Pbx1* is normally present in cardiac NCCs and their derivatives, its absence does not detectably affect their migration and appropriate localization to the cardiac OFT.

### ***Pbx1* is required for *Pax3* promoter activity in rhombomeres where cardiac NCCs originate**

To further assess the impact of *Pbx1* deficiency on NCCs, fate mapping studies were performed using *Pax3Cre* transgenic mice, which express Cre under the control of the *Pax3* 1.6 kb proximal promoter (Li et al., 2000). Like *Wnt1Cre*, *Pax3Cre* targets Cre activity to cardiac NCCs at their rhombomeric origins, prior to



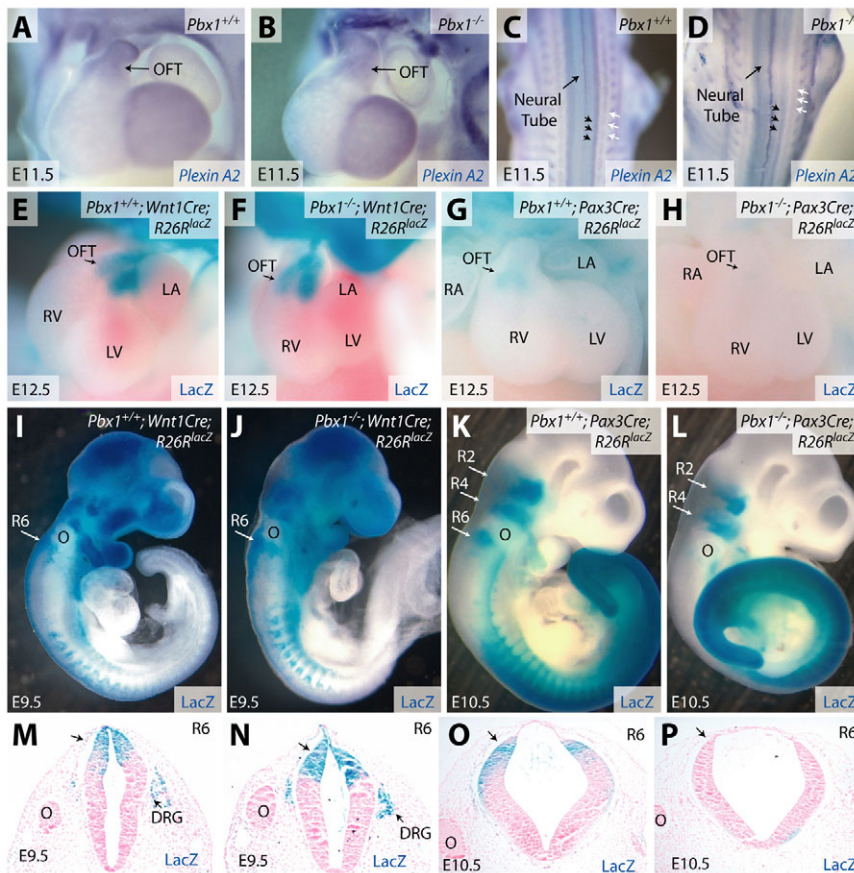

**Fig. 4. *Pbx1* deficiency has no effect on the migration of cardiac NCCs but abolishes *Pax3* proximal promoter activity in rhombomere 6.** (A-D) Whole-mount in situ hybridization for plexin A2 transcripts (blue) in *Pbx1*<sup>+/+</sup> (A,C) and *Pbx1*<sup>-/-</sup> (B,D) E11.5 mouse embryos. Frontal heart views (A,B) and dorsal views (C,D) of the embryos are shown. Black arrows indicate dorsal root ganglia and white arrows indicate sympathetic chains.

(E-L) Whole-mount  $\beta$ -galactosidase (*lacZ*) staining (blue) of *Pbx1*<sup>+/+</sup> (E,G,I,K) and *Pbx1*<sup>-/-</sup> (F,H,J,L) embryos of the indicated ages and genotypes. *lacZ* expression is driven by the *Rosa26R*<sup>*lacZ*</sup> (*R26R*<sup>*lacZ*</sup>) allele in cell lineages that express Cre recombinase driven by either the *Wnt1* promoter (*Wnt1Cre*, E,F,I,J) or the *Pax3* 1.6 kb proximal promoter (*Pax3Cre*, G,H,K,L). (M-P) Transverse sections of the embryos shown in I-L at the level of R6. *lacZ*-expressing cells, derived from progenitors expressing either *Wnt1Cre* (M,N) or *Pax3Cre* (O,P), stain blue. Sections are counterstained with Nuclear Fast Red (pink). DRG, dorsal root ganglia; OFT, outflow tract; R, rhombomere; O, otic vesicle; RV, right ventricle; LV, left ventricle; LA, left atrium; RA, right atrium.

delamination from the neural tube (Li et al., 2000). In marked contrast to wild-type embryos, *Pax3* promoter-driven Cre activity was not detected in the cardiac OFT of *Pbx1*<sup>-/-</sup> embryos at E12.5 (Fig. 4G,H), even though cardiac NCCs successfully migrated into the OFT (Fig. 4B,F). To determine whether the absence of *Pax3Cre*-marked cells in the cardiac OFT results from inactivity of the *Pax3* promoter in premigratory cardiac NCCs, we examined the expression of  $\beta$ -galactosidase (*lacZ*) in the rhombomeres of E10.5 *Pax3Cre;R26R*<sup>*lacZ*</sup>;*Pbx1*<sup>-/-</sup> mice. In *Pbx1*<sup>+/+</sup> embryos, *Pax3Cre* drove *lacZ* expression in rhombomere (R) 2, 4 and 6, and in the streams of NCCs migrating from these regions (Fig. 4K). By contrast, *Pax3Cre* activity in *Pbx1*<sup>-/-</sup> embryos was selectively absent from R6 (Fig. 4L). Conversely, similar studies using the *Wnt1Cre;R26R*<sup>*lacZ*</sup> combination showed that *Wnt1* promoter activity was maintained in cardiac NCCs from R6, R7 and R8 in *Pbx1*<sup>-/-</sup> embryos (Fig. 4I,J). The absence of *Pax3Cre* and preservation of *Wnt1Cre* activity at the dorsal end of R6 was confirmed by histology of consecutive transverse sections in which R6 was marked by the caudal end of the otic vesicle (Fig. 4M-P). The difference between *Wnt1Cre* and *Pax3Cre* promoter activity in *Pbx1*<sup>-/-</sup> embryos does not reflect earlier activity of the *Pax3* promoter because, if any difference is present, *Wnt1Cre* activity initiated prior to that of *Pax3Cre* (see Fig. S1 in the supplementary material). Similarly, the *Wnt1Cre* domain in R6 through R8 appeared to entirely overlap with the missing R6 expression normally driven by the *Pax3* promoter. Therefore, the absence of *Pax3Cre*-marked cells in the OFT of *Pbx1*<sup>-/-</sup> embryos is not due to the loss of a subpopulation of *Pax3*-positive *Wnt1*-negative cardiac NCCs, but rather suggests a failure to activate the *Pax3* promoter in premigratory cardiac NCCs.

### ***Pbx1* regulates transient expression of *Pax3* in premigratory NCCs**

The loss of R6 expression driven by *Pax3Cre* but not *Wnt1Cre* implied that *Pbx1* regulates transcription of the *Pax3* 1.6 kb proximal promoter, a possibility consistent with the requirement for a *Pbx1* binding site within the *Pax3* proximal promoter for its full activity in embryos (Pruitt et al., 2004). However, using whole-mount in situ hybridization for *Pax3* transcripts, we found no clear change in *Pax3* in the neural tube of E9.5 *Pbx1*<sup>-/-</sup> embryos (Fig. 5A). This surprising result led us to examine the presence of *Pax3* in more detail using immunostaining of paraffin sections of wild-type and *Pbx1*-null embryos. In an 18-somite wild-type embryo (equivalent to E8.75), *Pax3* appeared in a broad dorsal pattern that was overlaid with considerably more abundant *Pax3* in a subset of cells at the extreme dorsal end of the neural tube of R6 (Fig. 5B). Interestingly, this cluster of cells that strongly expresses *Pax3*, which corresponds to the premigratory neural crest, was absent in a littermate *Pbx1*<sup>-/-</sup> embryo (Fig. 5C). However, *Pax3* was still found in migrating NCCs in the absence of *Pbx1* (Fig. 5C). We examined the presence of *Pax3* in the dorsal neural tube of the hindbrain from E8.0 through E9.5. *Pax3* was detected in a broad dorsal band in the neural tube of a zero-somite (E8.0) embryo (Fig. 5D), a pattern that was retained throughout the developmental stages examined (Fig. 5E-G). By contrast, the robust *Pbx1*-dependent presence of *Pax3* in premigratory NCCs was found only transiently, between E8.5 and E9.0 (Fig. 5B,E,F). At E9.5, *Pax3* was retained in a broad band of cells of the R6 dorsal neural tube, whereas the premigratory NCCs had relatively low levels of *Pax3* protein (Fig. 5G). Taken

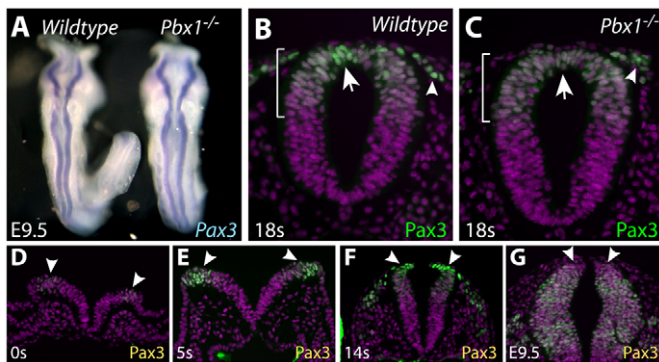

**Fig. 5. *Pbx1* is required for transient high expression of *Pax3* in premigratory NCCs.** (A) Dorsal view of wild-type (left) and *Pbx1*<sup>-/-</sup> (right) E9.5 mouse embryos stained by whole-mount in situ hybridization for *Pax3* transcripts (blue). (B-G) Transverse sections of embryos of the indicated ages [by somite (s) number (between E7.5 and E9.0) or embryonic date] immunostained for *Pax3* (green) and with Hoechst (purple). (B,C) Sections through R6 of wild-type (B) and *Pbx1*<sup>-/-</sup> (C) 18s embryos. The extent of the *Pax3*<sup>+</sup> domain in the dorsal neural tube is marked by a bracket. Arrows indicate a cluster of premigratory NCCs at the extreme dorsal end of the neural tube. Arrowheads mark migrating NCCs. (D-G) A time course of *Pax3* expression in the hindbrain between E7.5 and E9.5. Arrowheads mark the dorsal end of the neural tube.

together, these results show that *Pbx1* is required specifically for a transient burst of *Pax3* expression in premigratory NCCs of R6 prior to their delamination from the neural tube.

### ***Pbx1* transcriptional complexes activate the *Pax3* promoter**

In vitro studies were conducted to further assess the potential role of *Pbx1* in the transcriptional regulation of *Pax3*, which contains *Pbx1* binding sites in its promoter (Pruitt et al., 2004) (Fig. 6A). Electrophoretic mobility shift assays (EMSA) (Chang et al., 2004; Chang et al., 1995) confirmed that Site A, which contains a consensus *Pbx1*/*Meis1* binding sequence (5'-TGACAGTT-3') (Chang et al., 1997), supported robust cooperative binding by *Pbx1* and *Meis1*, but not binding by either protein alone (Fig. 6B). By contrast, *Pbx1* did not form binding complexes with several representative Hox proteins (*HoxB2*, *HoxB4* or *HoxB7*) on Site A (Fig. 6B and data not shown). Site B, which is located 1.1 kb upstream of the *Pax3* transcriptional start site, was bound robustly by *HoxB4* or *Meis1* in the presence of *Pbx1* (Fig. 6C). DNA binding by *HoxB2* and *HoxB7* on Site B was also dependent on *Pbx1* (data not shown). *Pbx1*-*Meis1*-*Hox* trimeric complexes did not form on either isolated Site A or Site B (Fig. 6B,C). The requirement for *Pbx1* in regulating *Pax3* promoter activity was assessed using a reporter gene containing the 1.6 kb *Pax3* promoter fragment (Li et al., 2000) in PC12 pheochromocytoma cells, which are derivatives of NCCs (Greene and Tischler, 1976). Whereas *HoxB4* alone produced a modest increase in *Pax3* promoter activity, co-transfection of *Pbx1* and *HoxB4* strongly activated transcription (Fig. 6D). Consistent with the binding studies, adding *Meis1* to the transfection mixture did not further enhance the *Pax3* transcriptional response (Fig. 6D). Thus, *Pbx1* partners with *Meis1* and *Hox* proteins to directly activate expression of *Pax3* through its proximal promoter elements. Taken together, our results show that *Pbx1* is essential for *Pax3* proximal promoter activity and for transient premigratory cardiac NCC expression of *Pax3*. We propose that activity of the *Pax3* 1.6 kb proximal promoter in vivo partially reflects *Pbx1*-dependent *Pax3* expression in premigratory cardiac

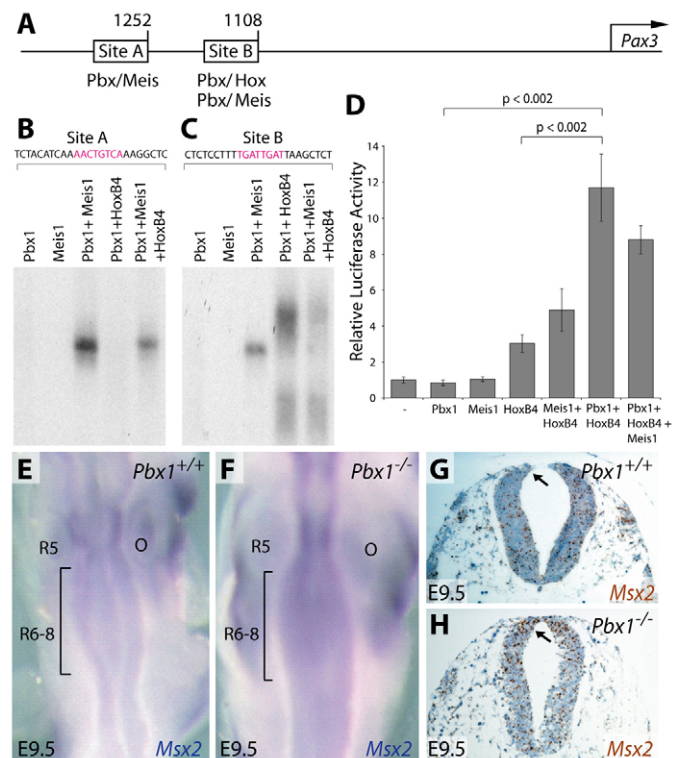

**Fig. 6. *Pbx1* transcriptional complexes activate the *Pax3* promoter and are required for repression of *Msx2* expression.** (A) Schematic of the mouse *Pax3* promoter showing the location of *Pbx*, *Meis* and *Hox* binding sites within Sites A and B. Numbers denote the distance (in bp) from the transcription start site (arrow) of the *Pax3* gene. (B,C) Electrophoretic mobility shift assays using the indicated in vitro translated transcription factors (*Pbx1*, *Meis1* and *HoxB4*) and radiolabeled DNA fragments from Site A (B) or Site B (C) of the *Pax3* promoter. (D) Transient reporter assays using a transfected plasmid containing the *Pax3* 1.6 kb proximal promoter driving luciferase expression and co-transfected plasmids expressing the indicated transcription factors. Fold activation was calculated relative to reporter baseline activity following normalization and is presented as the mean  $\pm$  one s.d. *P*-values were determined using Student's *t*-test. (E,F) Whole-mount in situ hybridization for *Msx2* (blue) in the hindbrain (dorsal view) in *Pbx1*<sup>+/+</sup> (E) and *Pbx1*<sup>-/-</sup> (F) E9.5 embryos. The bracketed regions indicate R6-8. (G,H) *Msx2* in situ hybridization (brown) on sections through R6 of *Pbx1*<sup>+/+</sup> (G) and *Pbx1*<sup>-/-</sup> (H) E9.5 embryos. The sections are counterstained with Hematoxylin (blue). The arrows indicate premigratory neural crest. O, otic vesicle; R, rhombomere.

NCCs. The broader and sustained dorsal neural tube expression of *Pax3* is likely to require additional regulatory elements outside the 1.6 kb region that are not under *Pbx1* control.

### ***Pax3* misexpression contributes to outflow tract defects in *Pbx1*<sup>-/-</sup> embryos**

Cardiac OFT defects in *Pax3* mutant embryos arise from derepression of its downstream target gene *Msx2*, as demonstrated by rescue of the PTA in *Pax3*<sup>+/+</sup>;*Msx2*<sup>-/-</sup> embryos (Kwang et al., 2002). Since *Msx2* is repressed by *Pax3*, the activation of which requires *Pbx1*, we examined *Pbx1*<sup>-/-</sup> embryos for misexpression of *Msx2*. By whole-mount RNA in situ hybridization, *Msx2* transcripts were detected in the neural tube of E9.5 wild-type embryos (Kwang et al., 2002), with high levels in R5 and lower levels in the cardiac NCC-originating R6-R8 (Fig. 6E). By contrast, considerably higher



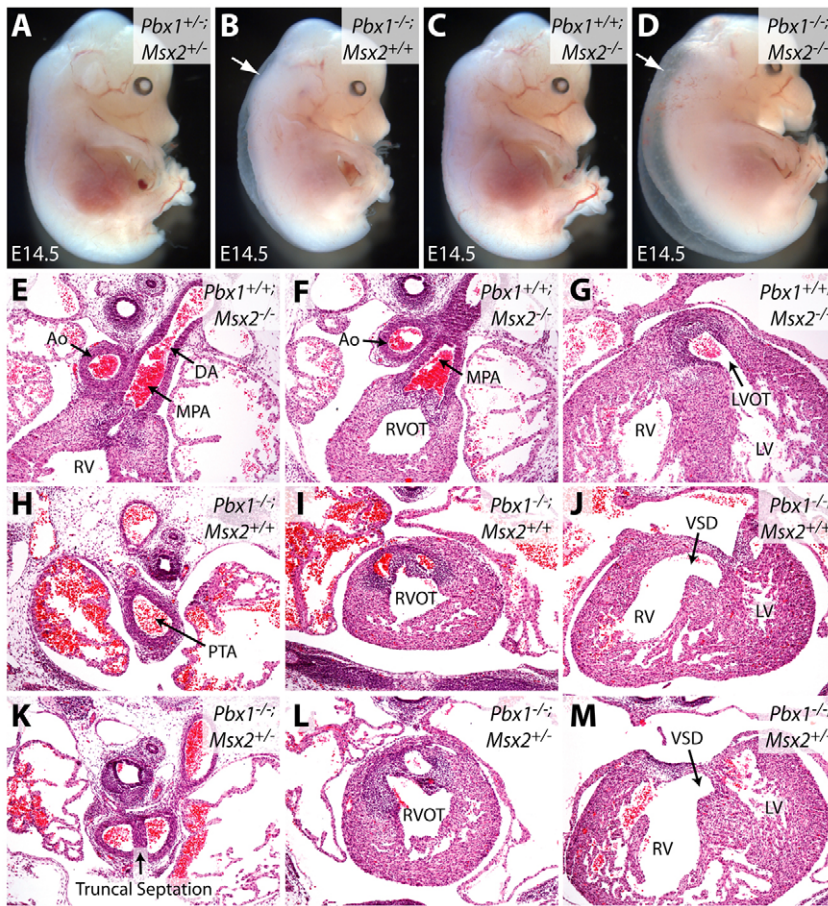

**Fig. 7. *Msx2* deficiency rescues the truncal septation defect of *Pbx1*<sup>-/-</sup> embryos.** (A–D) Gross morphology of E14.5 mouse embryos of the indicated genotypes with *Pbx1* and *Msx2* loss-of-function alleles. Arrows indicate generalized edema. (E–M) Hematoxylin and Eosin-stained transverse sections through E14.5 embryos of the indicated genotypes showing that loss of one allele of *Msx2* rescues truncal but not conal septation in *Pbx1*<sup>-/-</sup> embryos. Ao, aorta; DA, ductus arteriosus; MPA, main pulmonary artery; RV, right ventricle; RVOT and LVOT, right and left ventricular OFTs; LV, left ventricle; PTA, persistent truncus arteriosus; VSD, ventricular septal defect.

levels of *Msx2* transcripts were detected in R6 through R8 of littermate *Pbx1*<sup>-/-</sup> embryos (Fig. 6F). RNA in situ hybridization of tissue sections at the R6 level confirmed enhanced expression of *Msx2* transcripts in the dorsal neural tube in *Pbx1*<sup>-/-</sup> embryos (Fig. 6G,H). These results, which mirror those reported in *Pax3*<sup>-/-</sup> embryos, suggest that decreased *Pax3* expression in *Pbx1*<sup>-/-</sup> embryos results in derepression of *Msx2*, which then causes the observed OFT septation defects.

To assess whether *Msx2* misexpression contributes to the developmental abnormalities in *Pbx1*<sup>-/-</sup> embryos, mice with compound deficiencies of *Pbx1* and *Msx2* were generated by interbreeding. *Pbx1*<sup>-/-</sup>; *Msx2*<sup>-/-</sup> embryos (Fig. 7D) were grossly similar to *Pbx1*<sup>-/-</sup> embryos (Fig. 7B); they showed edema and did not survive past E14.5, in contrast to the normal appearance of *Msx2*<sup>-/-</sup> embryos (Fig. 7A,C). Thus, increased rhombomeric *Msx2* expression resulting from *Pbx1* deficiency does not account for the gross defects observed in *Pbx1*<sup>-/-</sup> embryos. Furthermore, angiography revealed that *Pbx1*<sup>-/-</sup>; *Msx2*<sup>+/-</sup> and *Pbx1*<sup>-/-</sup>; *Msx2*<sup>-/-</sup> embryos exhibited the same spectrum of great-artery malformations as seen in *Pbx1*<sup>-/-</sup> embryos, including cervical aortic arch, aberrant carotid and subclavian arteries (data not shown). This indicates that *Msx2* misexpression is not the main cause of the arterial patterning defects in *Pbx1*<sup>-/-</sup> mice.

The potential recovery of NCC contributions to OFT septation in *Pbx1*<sup>-/-</sup> embryos lacking *Msx2* was assessed by examining consecutive histologic sections through the cardiac OFT. This revealed significant rescue of septation of the distal (truncal) portion of the OFT in *Pbx1*<sup>-/-</sup>; *Msx2*<sup>+/-</sup> embryos (Fig. 7H,K) (4/6 embryos; mean length of septation, 75.8  $\mu$ m) and *Pbx1*<sup>-/-</sup>; *Msx2*<sup>-/-</sup>

embryos (data not shown) (3/4; mean, 47.5  $\mu$ m), as compared with littermate *Pbx1*<sup>-/-</sup> embryos (0/3; mean, 6.7  $\mu$ m) ( $P < 0.015$ ). Since rescue did not extend to the proximal (conal) region of the OFT (Fig. 7I,J,L,M), these *Pbx1*<sup>-/-</sup>; *Msx2*<sup>+/-</sup> embryos had a milder form of PTA, arising from the right ventricle with an associated ventricular septal defect. By comparison, *Msx2*<sup>+/-</sup> embryos had no defects in OFT septation (Fig. 7E–G). Septation of the distal truncal region of the OFT is provided by the NCC-derived aorticopulmonary septal complex (Hutson and Kirby, 2007). Thus, *Pbx1*<sup>-/-</sup> embryos deficient for one or both *Msx2* alleles had significant recovery of NCC function, with septation of the truncal, but not conal, region. These results demonstrate that dysfunction of the *Pax3*-*Msx2* transcriptional hierarchy contributes to septation defects in *Pbx1*<sup>-/-</sup> embryos, although it does not entirely account for the role of *Pbx1*, suggesting that *Pbx1* impacts additional pathways to regulate cardiac NCCs or other tissues contributing to OFT development.

## DISCUSSION

*Pbx1* is a global developmental regulator implicated in the formation of many organ systems (Brendolan et al., 2005; DiMartino et al., 2001; Manley et al., 2004; Schnabel et al., 2003a; Schnabel et al., 2003b; Zhang et al., 2006). However, the specific subordinate pathways that mediate its developmental contributions have not been extensively characterized. Our current studies extend the roles of *Pbx1* to major morphogenetic events underlying the patterning of branchial arch arteries and formation of the cardiac OFT (Fig. 8). Vascular abnormalities in *Pbx1*<sup>-/-</sup> embryos include cervical aortic arch, right-sided aortic arch, and retroesophageal vascular ring, each

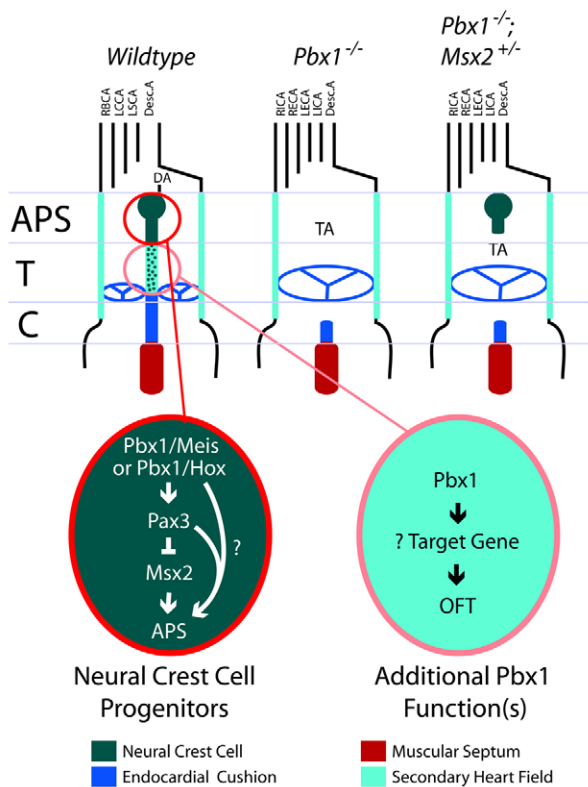

**Fig. 8. A working model of *Pbx1* function during branchial arch artery and conotruncal development in the mouse.** In the absence of *Pbx1*, the right and left internal and external carotid arteries branch directly off the aortic arch, the brachiocephalic artery is missing, and the right and left subclavian arteries have aberrant origins from the descending aorta. These defects originate in a failure to establish the fourth and sixth aortic arches owing to small or absent fourth and sixth branchial arches. In premigratory NCCs, *Pbx1*-*Meis* and/or *Pbx1*-*Hox* transcriptional complexes activate a transient but robust *Pax3* expression that is seen on E8. This induction is required to repress *Msx2* and ultimately guide establishment of the aorticopulmonary septum by cardiac NCCs. *Pbx1* complexes have additional, uncharacterized functions within NCCs or other cells in which *Pbx1* is expressed, including those of the secondary heart field, to regulate conotruncal septation at the base of the great arteries (aorta and main pulmonary artery) and conal region of the heart. APS, aorticopulmonary septum; DA, ductus arteriosus; T, truncus; C, conus; TA, truncus arteriosus; RBCA, right brachiocephalic artery; LCCA, left common carotid artery; LSCA, left subclavian artery; Desc.A, descending aorta; LICA and RICA, left and right internal carotid arteries; LECA and RECA, left and right external carotid arteries.

of which is frequently encountered in human patients (De la Cruz and Markwald, 1998; Sandler, 2004). The absence of cardiac OFT septation in *Pbx1*<sup>-/-</sup> embryos, resulting in PTA, is partially accounted for by loss of *Pax3* expression in premigratory NCCs, culminating in a failure of aorticopulmonary septation. Interestingly, the cardiovascular defects in *Pbx1*<sup>-/-</sup> embryos, combined with craniofacial abnormalities (Selleri et al., 2001) and hypoplastic thymus, thyroid and parathyroid glands (Manley et al., 2004), resemble the anomalies observed in patients with DiGeorge syndrome (Epstein, 2001), which results from a deletion of chromosome 22q11 that includes *TBX1*, *CRKL* and other genes (Merscher et al., 2001; Moon et al., 2006). These features

underscore the contributions of *Pbx1* to the development of the caudal branchial arches and their derived organs, in addition to the cardiac OFT.

Failure of *Pbx1*<sup>-/-</sup> embryos to establish the caudal branchial arches might result in the absence of the fourth and sixth arch arteries, eventually producing an abnormal great-artery pattern. Loss of the fourth and sixth arch arteries in *Pbx1*<sup>-/-</sup> embryos accounts for the anomalous derivation of the aortic arch from the third branchial arch and for the absence of the ductus arteriosus, which is normally derived from the sixth arch artery. The consequently more-rostral location of the aortic arch prevents the heart from descending into the thoracic cavity, resulting in a cervical position of the aortic arch and the heart. The third branchial arch artery might not remodel as normal, owing to increased blood flow in the absence of the fourth arch artery, as hemodynamics have recently been shown to cooperate in branchial arch artery remodeling (Yashiro et al., 2007). The anomalous aortic arch derived from the third arch artery lies at the position where the ICA and ECA normally branch from the CCA, resulting in all four carotid arteries emerging from the aortic arch. The change in position of the RSA to an origin off the descending aorta is likewise explained by the absence of the right fourth arch artery, which normally connects the RSA to the BCA. The LSA appears more caudal in origin because the heart has moved rostrally to a cervical location in *Pbx1*<sup>-/-</sup> embryos.

Misregulation of *Hox* activity, which depends on *Pbx* function, might contribute to the arch artery defects in *Pbx1*<sup>-/-</sup> embryos as *Hox* genes are known to regulate branchial arch artery patterning. *Hoxa3*-null mice exhibit regression of the third arch artery (Kameda et al., 2003), and antisense targeted to *Hox* transcripts causes aberrant arch arteries in chick embryos (Kirby et al., 1997). Despite the evidence for a role of *Pbx/Hox* genes in branchial arch artery development, chemical targeting of *Hox* mRNAs in the chick was not accompanied by cardiac OFT defects (Kirby et al., 1997). Nor have studies of *Hox*-deficient mice shown cardiac malformations, as seen in *Pbx1*-deficient embryos. This is likely to reflect redundancy in the contributions of *Hox* genes, which is circumvented by the broader *Hox* compromise induced by *Pbx1* deficiency. Further studies of *Pbx1*-deficient mice are likely to yield novel insights into the contributions of *Pbx1* and *Hox* genes to various regulatory pathways in cardiac development that might not be apparent from studies of *Hox*-deficient mice.

Our studies showing the requirement of a *Pbx1*-*Pax3*-*Msx2* pathway in cardiac development provide an additional example that *Pbx* and *Pax* genes act together to regulate organ development. *Pbx* proteins are known to regulate the expression of *Pax6* during pancreatic development (Zhang et al., 2006). Here, we demonstrate that *Pbx1* regulates *Pax3* expression to control development of the cardiac OFT and involving the function of NCCs. Besides OFT defects, *Splotch* mice, which are deficient for *Pax3*, exhibit defects in thymus, thyroid, parathyroid and branchial arch artery development, resembling the malformations observed in *Pbx1*<sup>-/-</sup> embryos and chicks ablated for NCCs (Conway et al., 1997; Epstein, 1996; Franz, 1989; Kirby et al., 1983; Kwang et al., 2002; Li et al., 1999). Similarities in these NCC-derived organ defects between *Splotch* and *Pbx1*<sup>-/-</sup> mice suggest that *Pax3* misregulation might underlie the phenotypes observed in *Pbx1*<sup>-/-</sup> embryos, including branchial arch artery defects. The arch artery defects, however, do not involve *Msx2* because *Msx2*<sup>+/-</sup> mutations fail to rescue the great-artery malformations of the *Pbx1*<sup>-/-</sup> embryos, despite the rescue of cardiac OFT development.



Cardiac OFT defects seen in *Pax3* mutants arise from derepression of its downstream target gene, *Msx2*, in rhombomeres where cardiac NCCs originate. This was demonstrated by rescue of PTA in *Pax3*<sup>-/-</sup>;*Msx2*<sup>-/-</sup> embryos (Kwang et al., 2002). In *Pbx1*<sup>-/-</sup> embryos, we observed a significant reduction of *Pax3* and enhancement of *Msx2* gene expression in rhombomeres contributing to cardiac NCCs. These observations, together with DNA-binding, cellular transactivation and transgenic reporter assays, indicate that *Pax3* is a direct in vivo transcriptional target of Pbx1, and establish a Pbx1-Pax3-*Msx2* transcriptional cascade in heart development. Genetic support for this conclusion is provided by a significant rescue of aorticopulmonary septation in 70% of embryos containing both *Pbx1* and *Msx2* mutations (*n*=10), as evidenced by reduction of the PTA to milder conal defects, which we have never observed in *Pbx1*<sup>-/-</sup> embryos (*n*=28). Given that *Pax3* and *Msx2* function cell-autonomously in NCCs to regulate cardiac OFT development (Kwang et al., 2002; Li et al., 1999), our rescue experiments suggest that misregulation of the Pbx1-Pax3-*Msx2* pathway in NCCs contributes to cardiac defects in *Pbx1*<sup>-/-</sup> embryos.

Although the partial rescue of PTA in *Pbx1*<sup>-/-</sup> embryos by *Msx2* deficiency points to *Pax3* misexpression within premigratory NCCs as underlying the truncal septation defects, we did not observe a widespread change in *Pax3* expression within the neural tube. Rather, *Pbx1*-null embryos lack a transient 'burst' of *Pax3* in premigratory NCCs prior to their delamination. By contrast, the newly emigrated NCCs retain normal *Pax3* levels in the absence of Pbx1. This is consistent with a lack of NCC emigration defects from the neural tube in both *Pbx1*- and *Pax3*-null embryos (Conway et al., 1997; Epstein et al., 2000). We propose that the *Pbx1*-dependent *Pax3* expression in premigratory NCCs confers a cellular identity to R6-derived cardiac NCCs that does not affect their migration, but specifies their ability to participate in OFT septation. BMP and FGF signaling pathways might cooperate with Pbx1 to induce the transient expression of *Pax3* in premigratory NCCs, given their roles in regulating *Pax3* expression in the dorsal neural tube of *Xenopus* embryos (Monsoro-Burq et al., 2005; Sato et al., 2005). It will be of interest to test these possibilities by early-targeted deletion of *Pbx1* and *Pax3* in NCCs prior to their emigration from the neural tube.

The rescue of truncal, but not conal, septation in *Pbx1*<sup>-/-</sup>;*Msx2*<sup>+/-</sup> embryos indicates that Pbx1 might regulate other, unidentified genes in NCCs independent of the Pax3-*Msx2* pathway (Fig. 7). Alternatively, Pbx1 might be required in other cell types that regulate OFT development and in which it is expressed, including SHF cells that provide the smooth muscle, endocardium and myocardium of the cardiac OFT (Kelly et al., 2001; Mjaatvedt et al., 2001; Verzi et al., 2005; Waldo et al., 2005). An additional possibility is the pharyngeal endoderm, where both *Fgf8* and *Tbx1*, the null phenotypes of which resemble that of *Pbx1*<sup>-/-</sup> embryos (Abu-Issa et al., 2002; Frank et al., 2002; Jerome and Papaioannou, 2001; Lindsay et al., 2001; Merscher et al., 2001), have been proposed to be required for OFT septation (Arnold et al., 2006; Brown et al., 2004; Park et al., 2006; Zhang et al., 2005). These potential non-NCC functions of Pbx1 require further investigations that will involve its tissue-specific deletion in the mesoderm, endoderm or SHF cells that express *Pbx1* and contribute to the development of the cardiac OFT.

We thank M. Ambrus, C. Nicolas, C. Hang and Dr M. Zeini for assistance; Dr J. Epstein for providing the plexin A2 probe and the *Pax3*Cre mice; Dr R. Maas for providing the *Msx2* probe; Dr A. McMahon for providing *Wnt1*Cre mice; and Drs G. Crabtree, M. Rabinovitch, D. Bernstein, T. Quertermous and members of the Chang laboratory for their advice. This work was supported by

funds from the National Cancer Institute (CA90735, CA42971) to M.L.C., and by funds from the National Heart Lung and Blood Institute (HL085345), American Heart Association (AHA), Children's Heart Foundation and March of Dimes Foundation to C.-P.C. K.S. is supported by an AHA postdoctoral fellowship, C.S. by an NIH NRSA fellowship, and K.Y.T. by the McCormick fellowship.

#### Supplementary material

Supplementary material for this article is available at <http://dev.biologists.org/cgi/content/full/135/21/3577/DC1>

#### References

- Abu-Issa, R., Smyth, G., Smoak, I., Yamamura, K. and Meyers, E. N. (2002). *Fgf8* is required for pharyngeal arch and cardiovascular development in the mouse. *Development* **129**, 4613-4625.
- Abu-Shaar, M., Ryoo, H. D. and Mann, R. S. (1999). Control of the nuclear localization of Extradenticle by competing nuclear import and export signals. *Genes Dev.* **13**, 935-945.
- Arnold, J. S., Werling, U., Braunstein, E. M., Liao, J., Nowotschin, S., Edelmann, W., Hebert, J. M. and Morrow, B. E. (2006). Inactivation of *Tbx1* in the pharyngeal endoderm results in 22q11DS malformations. *Development* **133**, 977-987.
- Brendolan, A., Ferretti, E., Salsi, V., Moses, K., Quaggin, S., Blasi, F., Cleary, M. L. and Selleri, L. (2005). A Pbx1-dependent genetic and transcriptional network regulates spleen ontogeny. *Development* **132**, 3113-3126.
- Brown, C. B., Feiner, L., Lu, M. M., Li, J., Ma, X., Webber, A. L., Jia, L., Raper, J. A. and Epstein, J. A. (2001). PlexinA2 and semaphorin signaling during cardiac neural crest development. *Development* **128**, 3071-3080.
- Brown, C. B., Wenning, J. M., Lu, M. M., Epstein, D. J., Meyers, E. N. and Epstein, J. A. (2004). Cre-mediated excision of *Fgf8* in the *Tbx1* expression domain reveals a critical role for *Fgf8* in cardiovascular development in the mouse. *Dev. Biol.* **267**, 190-202.
- Chang, C. P., Shen, W. F., Rozenfeld, S., Lawrence, H. J., Largman, C. and Cleary, M. L. (1995). Pbx proteins display hexapeptide-dependent cooperative DNA binding with a subset of Hox proteins. *Genes Dev.* **9**, 663-674.
- Chang, C. P., Brocchieri, L., Shen, W. F., Largman, C. and Cleary, M. L. (1996). Pbx modulation of Hox homeodomain amino-terminal arms establishes different DNA-binding specificities across the Hox locus. *Mol. Cell. Biol.* **16**, 1734-1745.
- Chang, C. P., Jacobs, Y., Nakamura, T., Jenkins, N. A., Copeland, N. G. and Cleary, M. L. (1997). Meis proteins are major in vivo DNA binding partners for wild-type but not chimeric Pbx proteins. *Mol. Cell. Biol.* **17**, 5679-5687.
- Chang, C. P., Chen, L. and Crabtree, G. R. (2003). Sonographic staging of the developmental status of mouse embryos in utero. *Genesis* **36**, 7-11.
- Chang, C. P., Neilson, J. R., Bayle, J. H., Gestwicki, J. E., Kuo, A., Stankunas, K., Graef, I. A. and Crabtree, G. R. (2004). A field of myocardial-endocardial NFAT signaling underlies heart valve morphogenesis. *Cell* **118**, 649-663.
- Chisaka, O. and Capecchi, M. R. (1991). Regionally restricted developmental defects resulting from targeted disruption of the mouse homeobox gene *hox-1.5*. *Nature* **350**, 473-479.
- Chisaka, O. and Kameda, Y. (2005). *Hoxa3* regulates the proliferation and differentiation of the third pharyngeal arch mesenchyme in mice. *Cell Tissue Res.* **320**, 77-89.
- Choe, S. K., Vlachakis, N. and Sagerstrom, C. G. (2002). Meis family proteins are required for hindbrain development in the zebrafish. *Development* **129**, 585-595.
- Conway, S. J., Henderson, D. J., Kirby, M. L., Anderson, R. H. and Copp, A. J. (1997). Development of a lethal congenital heart defect in the *spotch* (*Pax3*) mutant mouse. *Cardiovasc. Res.* **36**, 163-173.
- De la Cruz, M. and Markwald, R. R. (1998). *Living Morphogenesis of the Heart*. Boston, MA: Birkhauser.
- DiMartino, J. F., Selleri, L., Traver, D., Firpo, M. T., Rhee, J., Warnke, R., O'Gorman, S., Weissman, I. L. and Cleary, M. L. (2001). The Hox cofactor and proto-oncogene Pbx1 is required for maintenance of definitive hematopoiesis in the fetal liver. *Blood* **98**, 618-626.
- Epstein, J. (1996). Pax3, neural crest and cardiovascular development. *Trends Cardiovasc. Med.* **6**, 255-261.
- Epstein, J. A. (2001). Developing models of DiGeorge syndrome. *Trends Genet.* **17**, S13-S17.
- Epstein, J. A., Li, J., Lang, D., Chen, F., Brown, C. B., Jin, F., Lu, M. M., Thomas, M., Liu, E., Wessels, A. et al. (2000). Migration of cardiac neural crest cells in *Spotch* embryos. *Development* **127**, 1869-1878.
- Frank, D. U., Fotheringham, L. K., Brewer, J. A., Muglia, L. J., Tristani-Firouzi, M., Capecchi, M. R. and Moon, A. M. (2002). An *Fgf8* mouse mutant phenocopies human 22q11 deletion syndrome. *Development* **129**, 4591-4603.
- Franz, T. (1989). Persistent truncus arteriosus in the *Spotch* mutant mouse. *Anat. Embryol.* **180**, 457-464.
- Greene, L. A. and Tischler, A. S. (1976). Establishment of a noradrenergic clonal line of rat adrenal pheochromocytoma cells which respond to nerve growth factor. *Proc. Natl. Acad. Sci. USA* **73**, 2424-2428.

- Harvey, R. P. and Rosenthal, N. (1999). *Heart Development*. New York, NY: Academic Press.
- Hutson, M. R. and Kirby, M. L. (2007). Model systems for the study of heart development and disease. Cardiac neural crest and conotruncal malformations. *Semin. Cell Dev. Biol.* **18**, 101-110.
- Jacobs, Y., Schnabel, C. and Cleary, M. (1999). Trimeric association of Hox and TALE homeodomain proteins mediates Hoxb2 hindbrain enhancer activity. *Mol. Cell. Biol.* **19**, 5134-5142.
- Jerome, L. A. and Papaioannou, V. E. (2001). DiGeorge syndrome phenotype in mice mutant for the T-box gene, Tbx1. *Nat. Genet.* **27**, 286-291.
- Jiang, X., Rowitch, D. H., Soriano, P., McMahon, A. P. and Sucov, H. M. (2000). Fate of the mammalian cardiac neural crest. *Development* **127**, 1607-1616.
- Kameda, Y., Watari-Goshima, N., Nishimaki, T. and Chisaka, O. (2003). Disruption of the Hoxa3 homeobox gene results in anomalies of the carotid artery system and the arterial baroreceptors. *Cell Tissue Res.* **311**, 343-352.
- Kelly, R. G., Brown, N. A. and Buckingham, M. E. (2001). The arterial pole of the mouse heart forms from Fgf10-expressing cells in pharyngeal mesoderm. *Dev. Cell* **1**, 435-440.
- Kim, S. K., Selleri, L., Lee, J. S., Zhang, A. Y., Gu, X., Jacobs, Y. and Cleary, M. L. (2002). Pbx1 inactivation disrupts pancreas development and in *lpl1*-deficient mice promotes diabetes mellitus. *Nat. Genet.* **30**, 430-435.
- Kirby, M. L. (2007). *Cardiac Development*. New York, NY: Oxford University Press.
- Kirby, M. L., Gale, T. F. and Stewart, D. E. (1983). Neural crest cells contribute to normal aorticopulmonary septation. *Science* **220**, 1059-1061.
- Kirby, M. L., Hunt, P., Wallis, K. and Thorogood, P. (1997). Abnormal patterning of the aortic arch arteries does not evoke cardiac malformations. *Dev. Dyn.* **208**, 34-47.
- Knoepfler, P. S. and Kamps, M. P. (1995). The pentapeptide motif of Hox proteins is required for cooperative DNA binding with Pbx1, physically contacts Pbx1, and enhances DNA binding by Pbx1. *Mol. Cell. Biol.* **15**, 5811-5819.
- Kwang, S. J., Brugger, S. M., Lazik, A., Merrill, A. E., Wu, L. Y., Liu, Y. H., Ishii, M., Sangiorgi, F. O., Rauchman, M., Sucov, H. M. et al. (2002). Msx2 is an immediate downstream effector of Pax3 in the development of the murine cardiac neural crest. *Development* **129**, 527-538.
- Li, J., Liu, K. C., Jin, F., Lu, M. M. and Epstein, J. A. (1999). Transgenic rescue of congenital heart disease and spina bifida in *Splotch* mice. *Development* **126**, 2495-2503.
- Li, J., Chen, F. and Epstein, J. A. (2000). Neural crest expression of Cre recombinase directed by the proximal Pax3 promoter in transgenic mice. *Genesis* **26**, 162-164.
- Lindsay, E. A., Vitelli, F., Su, H., Morishima, M., Huynh, T., Pramparo, T., Jurecic, V., Ogunrinu, G., Sutherland, H. F., Scambler, P. J. et al. (2001). Tbx1 haploinsufficiency in the DiGeorge syndrome region causes aortic arch defects in mice. *Nature* **410**, 97-101.
- MacKenzie, A., Ferguson, M. W. and Sharpe, P. T. (1992). Expression patterns of the homeobox gene, Hox-8, in the mouse embryo suggest a role in specifying tooth initiation and shape. *Development* **115**, 403-420.
- Manley, N. R., Selleri, L., Brendolan, A., Gordon, J. and Cleary, M. L. (2004). Abnormalities of caudal pharyngeal pouch development in Pbx1 knockout mice mimic loss of Hox3 paralogs. *Dev. Biol.* **276**, 301-312.
- Merscher, S., Funke, B., Epstein, J. A., Heyer, J., Puech, A., Lu, M. M., Xavier, R. J., Demay, M. B., Russell, R. G., Factor, S. et al. (2001). TBX1 is responsible for cardiovascular defects in velo-cardio-facial/DiGeorge syndrome. *Cell* **104**, 619-629.
- Mjaatvedt, C. H., Nakaoka, T., Moreno-Rodriguez, R., Norris, R. A., Kern, M. J., Eisenberg, C. A., Turner, D. and Markwald, R. R. (2001). The outflow tract of the heart is recruited from a novel heart-forming field. *Dev. Biol.* **238**, 97-109.
- Monsoro-Burq, A. H., Wang, E. and Harland, R. (2005). Msx1 and Pax3 cooperate to mediate FGF8 and WNT signals during *Xenopus* neural crest induction. *Dev. Cell* **8**, 167-178.
- Moon, A. M., Guris, D. L., Seo, J. H., Li, L., Hammond, J., Talbot, A. and Imamoto, A. (2006). Crkl deficiency disrupts Fgf8 signaling in a mouse model of 22q11 deletion syndromes. *Dev. Cell* **10**, 71-80.
- Park, E. J., Ogden, L. A., Talbot, A., Evans, S., Cai, C. L., Black, B. L., Frank, D. U. and Moon, A. M. (2006). Required, tissue-specific roles for Fgf8 in outflow tract formation and remodeling. *Development* **133**, 2419-2433.
- Peltenburg, L. T. and Murre, C. (1996). Engrailed and Hox homeodomain proteins contain a related Pbx interaction motif that recognizes a common structure present in Pbx. *EMBO J.* **15**, 3385-3393.
- Phelan, M. L., Rambaldi, I. and Featherstone, M. S. (1995). Cooperative interactions between HOX and PBX proteins mediated by a conserved peptide motif. *Mol. Cell. Biol.* **15**, 3989-3997.
- Pruitt, S. C., Bussman, A., Maslov, A. Y., Natoli, T. A. and Heinaman, R. (2004). Hox/Pbx and Brn binding sites mediate Pax3 expression *in vitro* and *in vivo*. *Gene Expr. Patterns* **4**, 671-685.
- Sandler, T. (2004). *Langman's Medical Embryology*. Philadelphia, PA: Lippincott Williams & Wilkins.
- Sato, T., Sasai, N. and Sasai, Y. (2005). Neural crest determination by co-activation of Pax3 and Zic1 genes in *Xenopus* ectoderm. *Development* **132**, 2355-2363.
- Schnabel, C. A., Selleri, L., Jacobs, Y., Warnke, R. and Cleary, M. L. (2001). Expression of Pbx1b during mammalian organogenesis. *Mech. Dev.* **100**, 131-135.
- Schnabel, C. A., Godin, R. E. and Cleary, M. L. (2003a). Pbx1 regulates nephrogenesis and ureteric branching in the developing kidney. *Dev. Biol.* **254**, 262-276.
- Schnabel, C. A., Selleri, L. and Cleary, M. L. (2003b). Pbx1 is essential for adrenal development and urogenital differentiation. *Genesis* **37**, 123-130.
- Selleri, L., Depew, M. J., Jacobs, Y., Chanda, S. K., Tsang, K. Y., Cheah, K. S., Rubenstein, J. L., O'Gorman, S. and Cleary, M. L. (2001). Requirement for Pbx1 in skeletal patterning and programming chondrocyte proliferation and differentiation. *Development* **128**, 3543-3557.
- Stankunas, K., Hang, C. T., Tsun, Z. Y., Chen, H., Lee, N. V., Wu, J. I., Shang, C., Bayle, J. H., Shou, W., Iruela-Arispe, M. L. et al. (2008a). Endocardial Brg1 represses ADAMTS1 to maintain the microenvironment for myocardial morphogenesis. *Dev. Cell* **14**, 298-311.
- Stankunas, K., Shang, C., Twu, K. Y., Kao, S. C., Jenkins, N. A., Copeland, N. G., Sanyal, M., Selleri, L., Cleary, M. L. and Chang, C. P. (2008b). Pbx/Meis deficiencies demonstrate multigenetic origins of congenital heart disease. *Circ. Res.* **103**, 702-709.
- Verzi, M. P., McCulley, D. J., De Val, S., Dodou, E. and Black, B. L. (2005). The right ventricle, outflow tract, and ventricular septum comprise a restricted expression domain within the secondary/anterior heart field. *Dev. Biol.* **287**, 134-145.
- Waldo, K. L., Hutson, M. R., Ward, C. C., Zdanowicz, M., Stadt, H. A., Kumiski, D., Abu-Issa, R. and Kirby, M. L. (2005). Secondary heart field contributes myocardium and smooth muscle to the arterial pole of the developing heart. *Dev. Biol.* **281**, 78-90.
- Waskiewicz, A. J., Rikhof, H. A., Hernandez, R. E. and Moens, C. B. (2001). Zebrafish Meis functions to stabilize Pbx proteins and regulate hindbrain patterning. *Development* **128**, 4139-4151.
- Waskiewicz, A. J., Rikhof, H. A. and Moens, C. B. (2002). Eliminating zebrafish pbx proteins reveals a hindbrain ground state. *Dev. Cell* **3**, 723-733.
- Wu, H., Kao, S. C., Barrientos, T., Baldwin, S. H., Olson, E. N., Crabtree, G. R., Zhou, B. and Chang, C. P. (2007). Down syndrome critical region-1 is a transcriptional target of nuclear factor of activated T cells-c1 within the endocardium during heart development. *J. Biol. Chem.* **282**, 30673-30679.
- Yashiro, K., Shiratori, H. and Hamada, H. (2007). Haemodynamics determined by a genetic programme govern asymmetric development of the aortic arch. *Nature* **450**, 285-288.
- Zhang, X., Rowan, S., Yue, Y., Heaney, S., Pan, Y., Brendolan, A., Selleri, L. and Maas, R. L. (2006). Pax6 is regulated by Meis and Pbx homeoproteins during pancreatic development. *Dev. Biol.* **300**, 748-757.
- Zhang, Z., Cerrato, F., Xu, H., Vitelli, F., Morishima, M., Vincentz, J., Furuta, Y., Ma, L., Martin, J. F., Baldini, A. et al. (2005). Tbx1 expression in pharyngeal epithelia is necessary for pharyngeal arch artery development. *Development* **132**, 5307-5315.
